# Supplementary material for: Effect of trace elements in the toxicity of copper to Chlamydomonas reinhardtii
Source: Royal Society of Chemistry journal article supplement (doi:10.1039/d1em00521a), 2022-01-01
Supplement: d1em00521a1.pdf [file d1em00521a1.pdf]

*Supporting information*

**Effect of Trace Elements in the Toxicity of Copper to  
*Chlamydomonas reinhardtii***

Hui Chen<sup>a</sup>, Xin Shen<sup>a</sup>, Yiping Ying<sup>a</sup>, Xiang Li<sup>a</sup>, Lili Chen<sup>a</sup>, Chensi Shen<sup>b</sup>,  
YuezhongWen<sup>c\*</sup>

<sup>a</sup> *College of Science and Technology, Ningbo University, Cixi 315302,  
China*

<sup>b</sup> *College of Environmental Science and Engineering, Donghua  
University, Shanghai 201620, China*

<sup>c</sup> *Key Laboratory of Pollution Exposure and Health Intervention of  
Zhejiang Province, Interdisciplinary Research Academy (IRA), Zhejiang  
Shuren University, Hangzhou 310015, China*

---

\* Corresponding author:

Tel.: +86-571-8898-2421. Fax: +86-571-8898-2421.

E-mail address: wenyuezhong@zju.edu.cn (Y.W.)

Table S1 TAP medium composition

| <b>Component</b>                                                                   | <b>Concentration in final medium</b> |
|------------------------------------------------------------------------------------|--------------------------------------|
| H <sub>2</sub> NC(CH <sub>2</sub> OH) <sub>3</sub>                                 | 2.00 × 10 <sup>-2</sup> M            |
| NH <sub>4</sub> Cl                                                                 | 7.00 × 10 <sup>-3</sup> M            |
| MgSO <sub>4</sub> ·7H <sub>2</sub> O                                               | 8.30 × 10 <sup>-4</sup> M            |
| CaCl <sub>2</sub> ·2H <sub>2</sub> O                                               | 4.50 × 10 <sup>-4</sup> M            |
| K <sub>2</sub> HPO <sub>4</sub>                                                    | 1.65 × 10 <sup>-3</sup> M            |
| KH <sub>2</sub> PO <sub>4</sub>                                                    | 1.05 × 10 <sup>-3</sup> M            |
| Na <sub>2</sub> EDTA·2H <sub>2</sub> O                                             | 1.34 × 10 <sup>-4</sup> M            |
| ZnSO <sub>4</sub> ·7H <sub>2</sub> O                                               | 1.36 × 10 <sup>-6</sup> M            |
| H <sub>3</sub> BO <sub>3</sub>                                                     | 1.84 × 10 <sup>-4</sup> M            |
| MnCl <sub>2</sub> ·4H <sub>2</sub> O                                               | 4.00 × 10 <sup>-5</sup> M            |
| FeSO <sub>4</sub> ·7H <sub>2</sub> O                                               | 3.29 × 10 <sup>-5</sup> M            |
| CoCl <sub>2</sub> ·6H <sub>2</sub> O                                               | 1.23 × 10 <sup>-5</sup> M            |
| CuSO <sub>4</sub> ·5H <sub>2</sub> O                                               | 1.00 × 10 <sup>-5</sup> M            |
| (NH <sub>4</sub> ) <sub>6</sub> Mo <sub>7</sub> O <sub>24</sub> ·4H <sub>2</sub> O | 9.28 × 10 <sup>-7</sup> M            |
| CH <sub>3</sub> COOH                                                               | 1 mL/L                               |

Table S2 Concentrations of trace elements in the control without algae group

| <b>Control without algae</b> | <b>Concentration (μM)</b> |
|------------------------------|---------------------------|
| Cu                           | 10.062 ± 0.4147           |
| Fe                           | 32.857 ± 0.5463           |
| Zn                           | 135.974 ± 0.8122          |
| Mn                           | 40.025 ± 0.4574           |
